# Supplementary material for: Genetic ablation of fibroblast activation protein alpha attenuates left ventricular dilation after myocardial infarction
Source: PubMed Central journal article supplement (PMC7935287; doi:10.1371/journal.pone.0248196), 2021-03-05

# A

## FAP

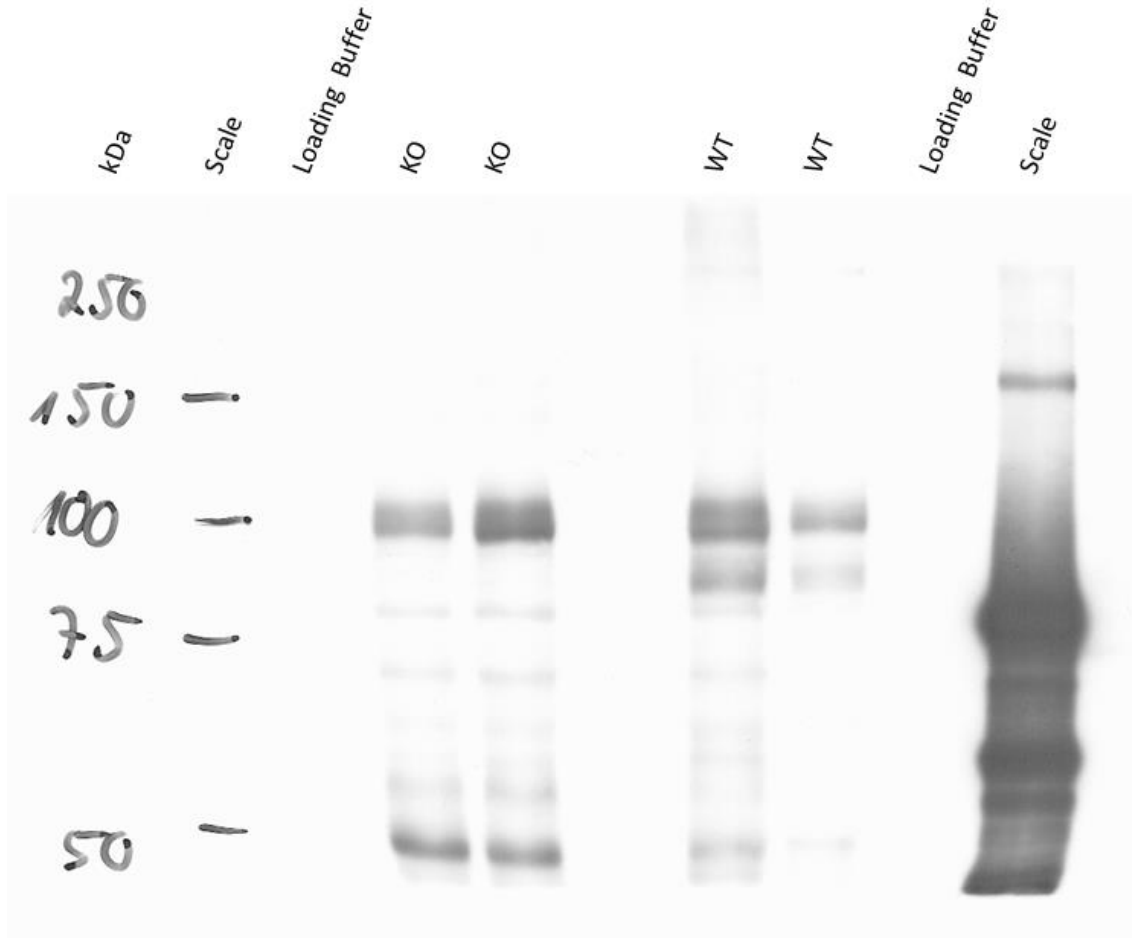

## GAPDH

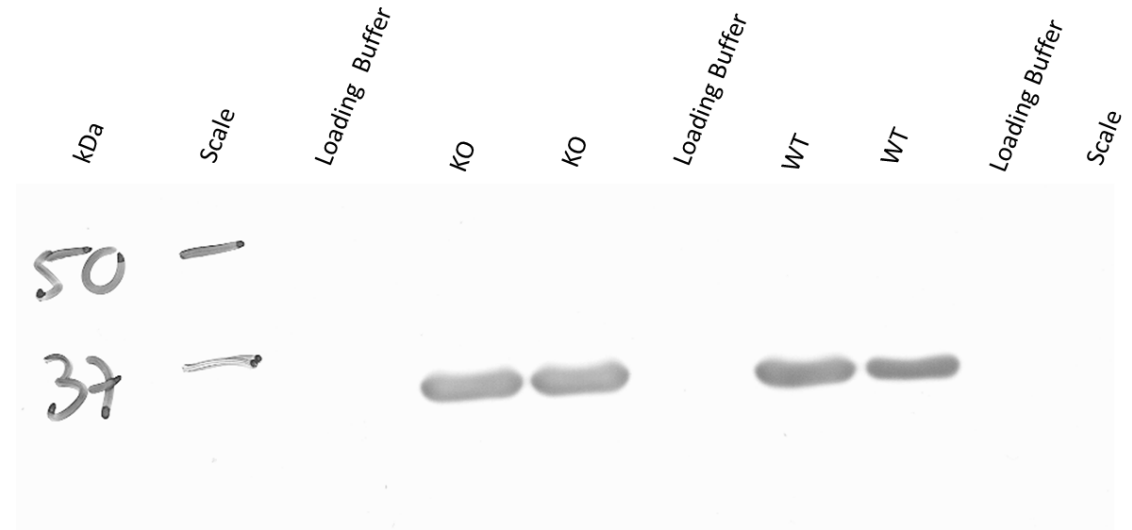

**B**

**FAP**

**GAPDH**

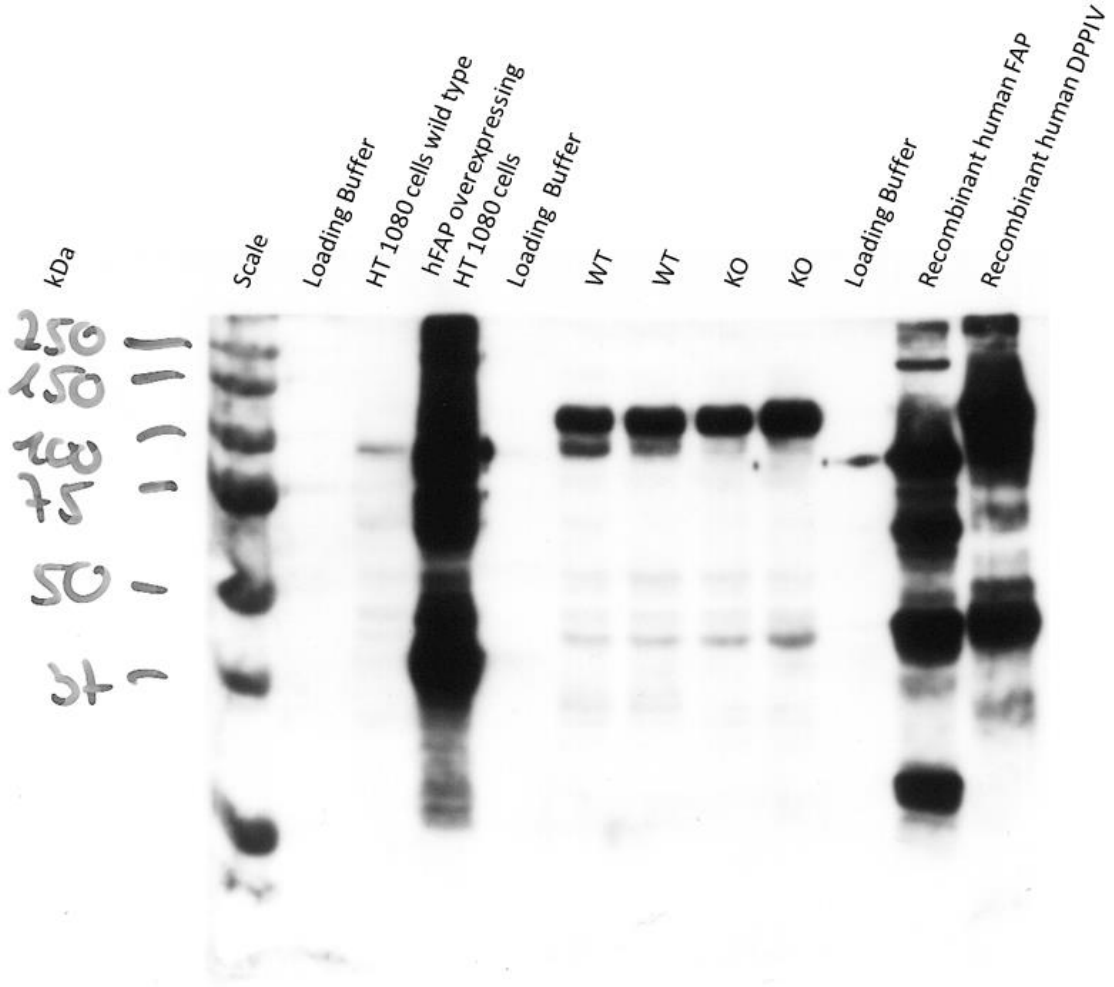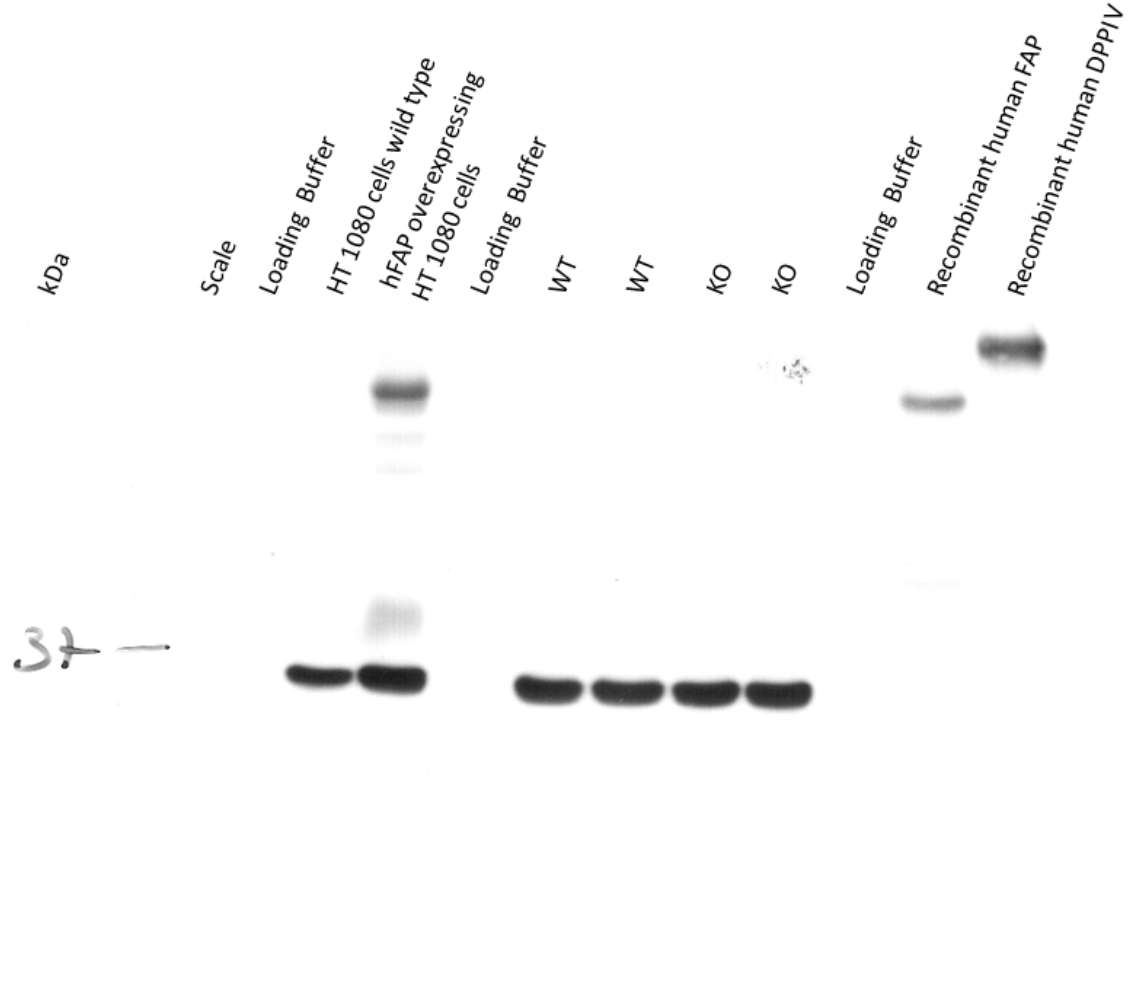

Supplement: pone.0248196.s004.pdf [file pone.0248196.s004.pdf]
